# Supplementary material for: Magnetospirillum magneticum as a Living Iron Chelator Induces TfR1 Upregulation and Decreases Cell Viability in Cancer Cells
Source: MDPI journal article supplement (doi:10.3390/ijms22020498), 2021-01-06
Supplement: s1 [file s1]

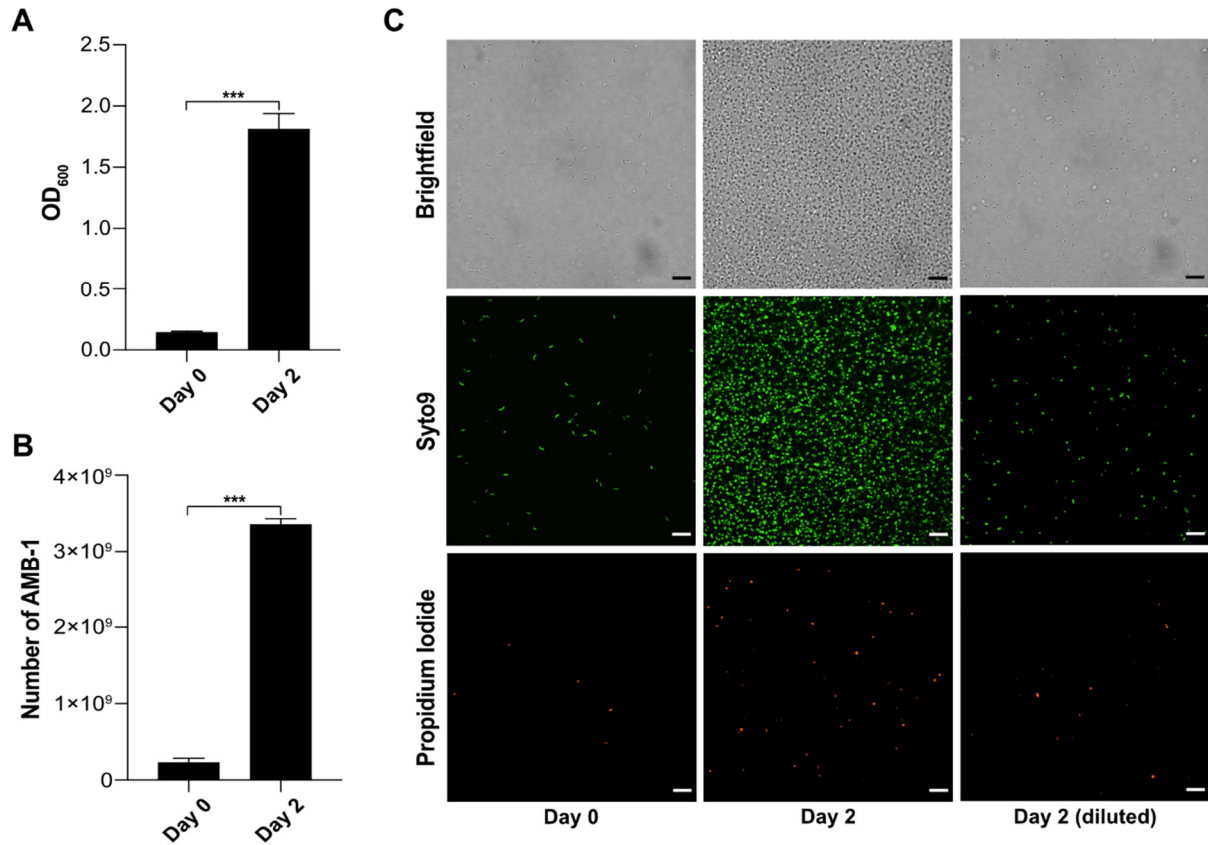

**Figure S1:** Quantification and imaging of proliferating AMB-1 bacteria at 37°C. **(A)** Optical density (OD<sub>600</sub>) measurements of bacteria on Day 0 and Day 2 using a multimode microplate reader (n=6, individual replicates, \*\*\* p-value < 0.001) **(B)** Quantification of the increasing number of AMB-1 bacteria measured on Day 0 and Day 2, (n=3, technical replicates, \*\*\* p-value < 0.001). Counting of bacteria was performed using a Multisizer 4e (Coulter Counter). **(C)** Representative fluorescence images show AMB-1 bacteria stained with Syto9 (green) and Propidium Iodide (red). Bacteria were imaged at on Day 0 and Day 2, demonstrating the increase in viable cells. A sample diluted 1:15 of Day 2 was included to facilitate identification of single cells, (scale bar: 10 μm)

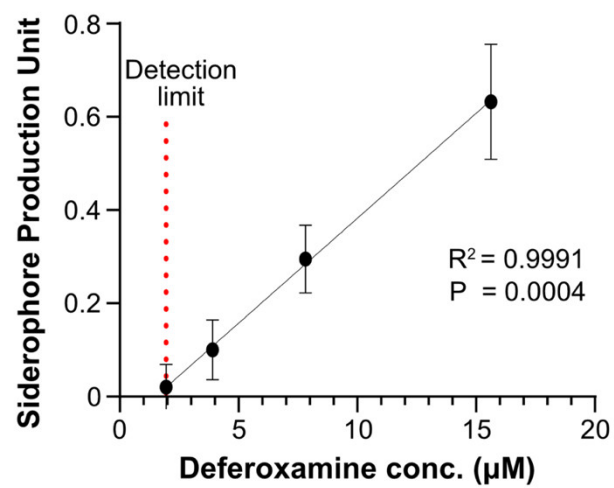

**Figure S2:** Calibration curve representing the siderophore production unit plotted against the concentration of deferoxamine (n= 3).

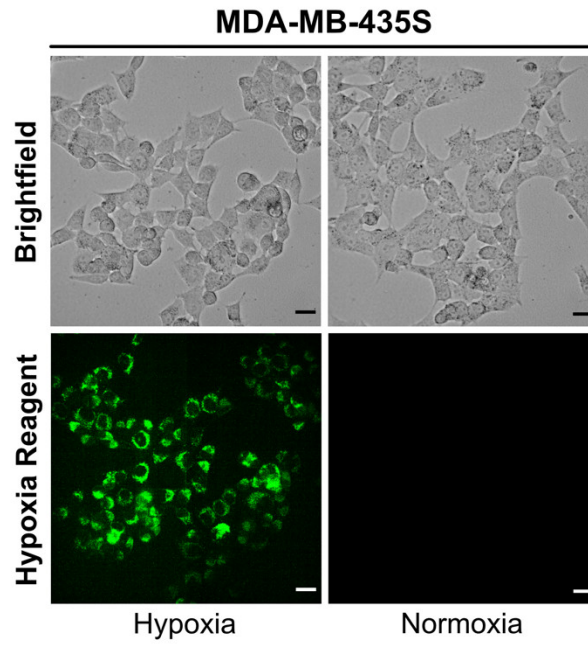

**Figure S3:** Comparison of in vitro cancer cell culture under either hypoxic or normoxic conditions. Representative fluorescence and brightfield images of MDA-MB-435S cells stained with Image-IT Green Hypoxia Reagent (green), (scale bar: 25  $\mu$ m).

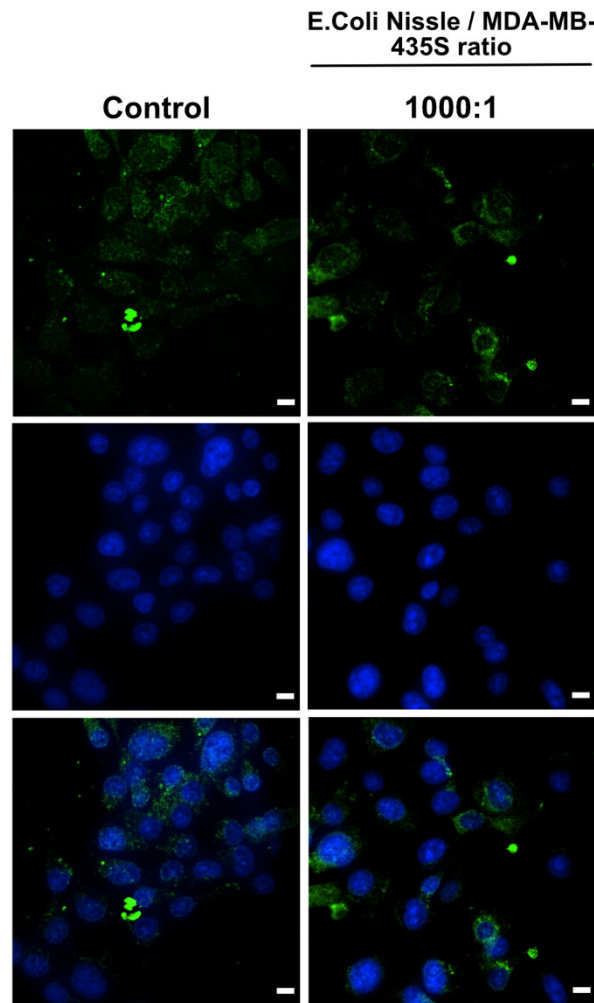

**Figure S4:** Immunofluorescence images of human melanoma cells co-cultured under hypoxic conditions for 48 hours with *E. coli* Nissle 1917. Images show MDA-MB-435S cells marked by anti-TfR1 antibody (green) and Hoechst 33342 (blue), (scale bar: 10  $\mu$ m).

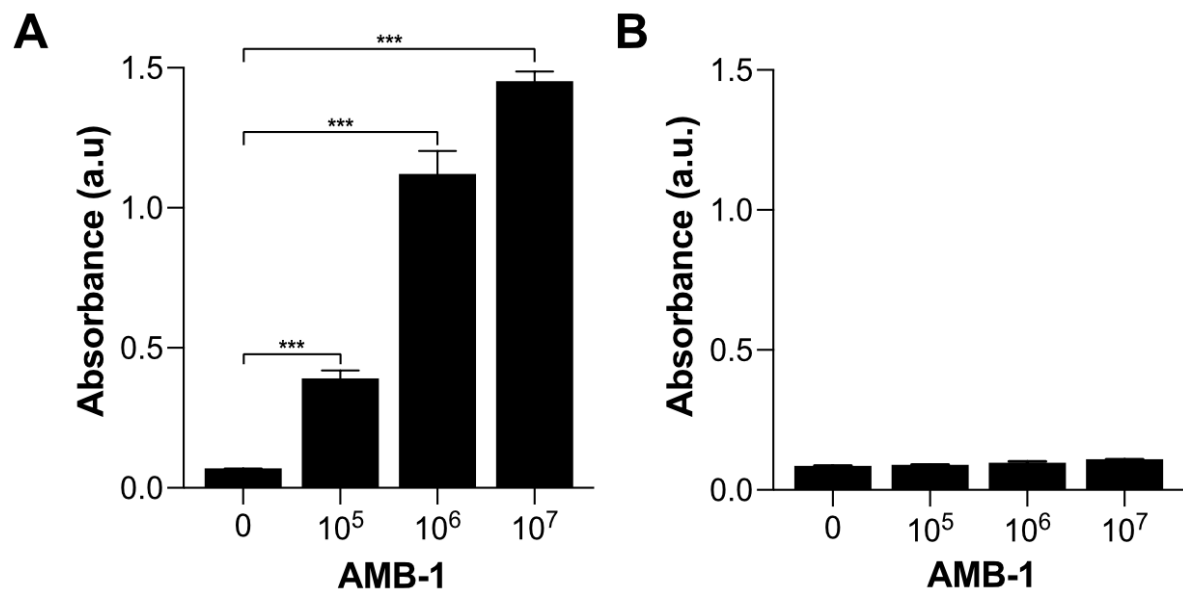

**Figure S5:** Determination of signal from MTB in wells following 0 and 3 washing steps. **(A)** Bacterial viability after 0 washing steps was determined using MTT assay and absorbance was measured at 540 nm. Signal is expressed as mean  $\pm$  SD of 3 replicates. Ordinary one-way ANOVA test was used to assess statistical significance (\*\*\*) p-value < 0.001). **(B)** Bacterial viability after 3 washing steps with DPBS was determined using an MTT assay and absorbance was measured at 540 nm. Signal is expressed as mean  $\pm$  SD of 3 replicates.
